# Supplementary material for: Is All Urban Green Space the Same? A Comparison of the Health Benefits of Trees and Grass in New York City
Source: PubMed Central journal article supplement (PMC5708050; doi:10.3390/ijerph14111411), 2017-11-18
Supplement: ijerph-14-01411-s001.pdf [file ijerph-14-01411-s001.pdf]

## Supplemental Material

### Contents

|                                                                                                                                                                                                                                                                                                                                      |   |
|--------------------------------------------------------------------------------------------------------------------------------------------------------------------------------------------------------------------------------------------------------------------------------------------------------------------------------------|---|
| Table S1. Comparison of survey sample retained in analysis to those omitted due to non-geocodeable residential cross-streets.....                                                                                                                                                                                                    | 2 |
| Table S2. RRs of self-reported “very good” or “excellent” health of increasing quartiles of percent vegetation within a 1000 m radius and a 300 m radius of the reported nearest cross-street adjusted for different combinations of air pollutants.....                                                                             | 3 |
| Table S3. Coefficients (and 95% CI) of continuous self-reported health (with higher values indicating better health) of increasing quartiles of percent vegetation from linear models.....                                                                                                                                           | 4 |
| Table S4. RRs and 95% CIs for the association between % trees, grass and total vegetation as a continuous measure by buffer size with self-reported “very good” or “excellent” health compared to “good”, “fair”, or “poor” self-reported health.....                                                                                | 5 |
| Table S5. RRs of self-reported very good or excellent health of increasing quartiles of percent trees, grass or vegetation within various radii of the reported nearest cross-street.....                                                                                                                                            | 6 |
| Table S6. RRs of self-reported very good or excellent health of increasing quartiles of percent trees, grass or vegetation within various radii of the reported nearest cross-street also adjusted for NO <sub>2</sub> at either the 300m or 1000m buffer size, whichever is closer in size to the radial buffer for vegetation..... | 7 |
| Figure S1. Map of tree and grass coverage at 3 ft resolution for all of NYC.....                                                                                                                                                                                                                                                     | 8 |
| Figure S2. RRs for self-reported very good or excellent health by quartiles of % grass or % trees at 1000m buffer by categorical SES levels additionally adjusted for individual-level and area-level SES, and NO <sub>2</sub> ....                                                                                                  | 9 |

**Table S1.** Comparison of survey samples retained in analysis to those omitted due to non-geocodeable residential cross-streets.

| Variable                                     | Sample Kept (N = 1281)                             | Omitted from Analysis (N = 278) <sup>a</sup>        | <i>p</i> -Value <sup>b</sup> |
|----------------------------------------------|----------------------------------------------------|-----------------------------------------------------|------------------------------|
| Sex (categorical)                            | 63.6% female                                       | 64.3% female                                        | 0.80                         |
| Education (categorical)                      | Median = 6 (Associate's degree)                    | Median = 5 (some college, no degree)                | <0.001                       |
| Income (categorical)                         | Median = 3 (\$46,000 to just under \$70,000)       | Median = 2 (\$23,000 to just under \$46,000)        | 0.10                         |
| Age (continuous)                             | Mean = 44.7                                        | Mean = 46.4                                         | 0.2                          |
| How long lived in neighborhood (categorical) | Median = 4 (10 years or more)                      | Median = 4 (10 years or more)                       | 0.3                          |
| Study Arm (categorical)                      | 9.5 % landline<br>32.0% cell phone<br>58.5% online | 15.5 % landline<br>46.4% cell phone<br>38.1% online | <0.001                       |
| Season (categorical)                         | 48.6% season 1                                     | 56.8% season 1                                      | 0.02                         |

<sup>a</sup> Number of observations for those dropped from analysis varies by variable and some were dropped due to missing values, <sup>b</sup> *p*-value from  $\chi^2$  test for categorical variables and t-test for continuous variables.

**Table S2.** RRs of self-reported “very good” or “excellent” health of increasing quartiles of percent vegetation within a 1000 m radius and a 300 m radius of the reported nearest cross-street adjusted for different combinations of air pollutants.

| Buffer           | Exposure         | Covariates                                 | First Quartile (Reference)                 | Second Quartile     | Third Quartile      | Fourth Quartile     |                   |
|------------------|------------------|--------------------------------------------|--------------------------------------------|---------------------|---------------------|---------------------|-------------------|
| 1000 m           | Trees            | SES + NO <sub>2</sub>                      | 1                                          | 1.24 (1.05, 1.46) * | 1.17 (0.98, 1.39)   | 1.37 (1.15, 1.63) * |                   |
|                  |                  | SES + PM <sub>2.5</sub>                    | 1                                          | 1.24 (1.05, 1.45) * | 1.17 (0.98, 1.39)   | 1.34 (1.13, 1.59) * |                   |
|                  |                  | SES + NO <sub>2</sub> + PM <sub>2.5</sub>  | 1                                          | 1.24 (1.05, 1.46) * | 1.17 (0.98, 1.39)   | 1.36 (1.15, 1.62) * |                   |
|                  |                  | SES + population density                   | 1                                          | 1.19 (1.01, 1.40) * | 1.10 (0.93, 1.30)   | 1.25 (1.07, 1.46) * |                   |
|                  |                  | SES + NO <sub>2</sub> + population density | 1                                          | 1.22 (1.03, 1.44) * | 1.15 (0.96, 1.37)   | 1.34 (1.13, 1.60) * |                   |
|                  | Grass            | SES + NO <sub>2</sub>                      | 1                                          | 1.09 (0.91, 1.30)   | 1.23 (1.00, 1.50) * | 1.25 (1.00, 1.57) * |                   |
|                  |                  | SES + PM <sub>2.5</sub>                    | 1                                          | 1.08 (0.91, 1.29)   | 1.21 (1.00, 1.47) * | 1.23 (0.99, 1.52) * |                   |
|                  |                  | SES + NO <sub>2</sub> + PM <sub>2.5</sub>  | 1                                          | 1.09 (0.91, 1.30)   | 1.23 (1.00, 1.50) * | 1.25 (1.00, 1.57) * |                   |
|                  |                  | SES + population density                   | 1                                          | 1.02 (0.87, 1.20)   | 1.13 (0.96, 1.34)   | 1.14 (0.95, 1.37)   |                   |
|                  |                  | SES + NO <sub>2</sub> + population density | 1                                          | 1.08 (0.91, 1.29)   | 1.24 (1.01, 1.52) * | 1.30 (1.03, 1.63) * |                   |
|                  | Total Vegetation | SES + NO <sub>2</sub>                      | 1                                          | 1.09 (0.91, 1.31)   | 1.27 (1.07, 1.52) * | 1.42 (1.15, 1.74) * |                   |
|                  |                  | SES + PM <sub>2.5</sub>                    | 1                                          | 1.09 (0.91, 1.32)   | 1.26 (1.06, 1.50) * | 1.36 (1.12, 1.67) * |                   |
|                  |                  | SES + NO <sub>2</sub> + PM <sub>2.5</sub>  | 1                                          | 1.10 (0.91, 1.32)   | 1.28 (1.07, 1.52) * | 1.41 (1.15, 1.74) * |                   |
|                  |                  | SES + population density                   | 1                                          | 1.03 (0.86, 1.22)   | 1.14 (0.98, 1.33)   | 1.22 (1.04, 1.44) * |                   |
|                  |                  | SES + NO <sub>2</sub> + population density | 1                                          | 1.09 (0.90, 1.31)   | 1.25 (1.05, 1.49) * | 1.41 (1.15, 1.74) * |                   |
|                  | 300 m            | Trees                                      | SES + NO <sub>2</sub>                      | 1                   | 0.99 (0.83, 1.17)   | 1.10 (0.94, 1.29)   | 1.05 (0.88, 1.26) |
|                  |                  |                                            | SES + PM <sub>2.5</sub>                    | 1                   | 0.99 (0.83, 1.17)   | 1.11 (0.95, 1.30)   | 1.04 (0.88, 1.24) |
|                  |                  |                                            | SES + NO <sub>2</sub> + PM <sub>2.5</sub>  | 1                   | 0.99 (0.83, 1.17)   | 1.11 (0.94, 1.30)   | 1.04 (0.87, 1.24) |
|                  |                  |                                            | SES + population density                   | 1                   | 0.95 (0.80, 1.13)   | 1.06 (0.91, 1.23)   | 0.99 (0.84, 1.17) |
|                  |                  |                                            | SES + NO <sub>2</sub> + population density | 1                   | 0.96 (0.81, 1.15)   | 1.08 (0.92, 1.27)   | 1.03 (0.86, 1.23) |
| Grass            |                  | SES + NO <sub>2</sub>                      | 1                                          | 0.84 (0.70, 1.01)   | 0.85 (0.71, 1.03)   | 0.98 (0.80, 1.22)   |                   |
|                  |                  | SES + PM <sub>2.5</sub>                    | 1                                          | 0.85 (0.71, 1.02)   | 0.86 (0.72, 1.04)   | 1.00 (0.81, 1.22)   |                   |
|                  |                  | SES + NO <sub>2</sub> + PM <sub>2.5</sub>  | 1                                          | 0.85 (0.71, 1.02)   | 0.86 (0.71, 1.04)   | 0.99 (0.80, 1.23)   |                   |
|                  |                  | SES + population density                   | 1                                          | 0.85 (0.71, 1.01)   | 0.86 (0.72, 1.02)   | 1.00 (0.83, 1.20)   |                   |
|                  |                  | SES + NO <sub>2</sub> + population density | 1                                          | 0.86 (0.72, 1.03)   | 0.88 (0.72, 1.07)   | 1.03 (0.82, 1.29)   |                   |
| Total Vegetation |                  | SES + NO <sub>2</sub>                      | 1                                          | 0.89 (0.75, 1.06)   | 0.98 (0.82, 1.18)   | 1.01 (0.82, 1.24)   |                   |
|                  |                  | SES + PM <sub>2.5</sub>                    | 1                                          | 0.90 (0.76, 1.07)   | 0.99 (0.83, 1.17)   | 1.00 (0.82, 1.22)   |                   |
|                  |                  | SES + NO <sub>2</sub> + PM <sub>2.5</sub>  | 1                                          | 0.90 (0.76, 1.07)   | 0.99 (0.82, 1.18)   | 1.00 (0.81, 1.23)   |                   |
|                  |                  | SES + population density                   | 1                                          | 0.87 (0.74, 1.03)   | 0.95 (0.81, 1.12)   | 0.97 (0.82, 1.16)   |                   |
|                  |                  | SES + NO <sub>2</sub> + population density | 1                                          | 0.88 (0.75, 1.05)   | 0.98 (0.82, 1.17)   | 1.01 (0.82, 1.24)   |                   |

All models additionally controlled for season, sampling frame, neighborhood tenure, age, sex, race/ethnicity, individual SES (two-level categorical variable for education, and a six-level categorical variable for income), and area-level SES (% of census tract unemployed and % of census tract living below twice the FPL). \*  $p < 0.05$ , SES: socio-economic status.

**Table S3.** Coefficients (and 95% CI) of continuous self-reported health (with higher values indicating better health) of increasing quartiles of percent vegetation from linear models.

| Buffer | Exposure         | Covariates          | First Quartile (Reference) | Second Quartile        | Third Quartile      | Fourth Quartile     |
|--------|------------------|---------------------|----------------------------|------------------------|---------------------|---------------------|
| 1000 m | Trees            | SES                 | 0                          | 0.15 (0.01, 0.30) *    | 0.04 (-0.09, 0.18)  | 0.20 (0.07, 0.33) * |
|        |                  | SES+NO <sub>2</sub> | 0                          | 0.17 (0.02, 0.31)      | 0.08 (-0.06, 0.22)  | 0.26 (0.11, 0.40) * |
|        | Grass            | SES                 | 0                          | 0.01 (-0.14, 0.16)     | 0.08 (-0.08, 0.24)  | 0.06 (-0.08, 0.20)  |
|        |                  | SES+NO <sub>2</sub> | 0                          | 0.08 (-0.08, 0.24)     | 0.18 (0.00, 0.36)   | 0.21 (0.01, 0.41) * |
|        | Total Vegetation | SES                 | 0                          | 0.03 (-0.11, 0.17)     | 0.06 (-0.09, 0.21)  | 0.13 (-0.01, 0.27)  |
|        |                  | SES+NO <sub>2</sub> | 0                          | 0.09 (-0.06, 0.25)     | 0.14 (-0.02, 0.31)  | 0.28 (0.1, 0.46) *  |
| 300 m  | Trees            | SES                 | 0                          | 0.00 (-0.14, 0.15)     | 0.07 (-0.07, 0.21)  | -0.03 (-0.18, 0.12) |
|        |                  | SES+NO <sub>2</sub> | 0                          | 0.02 (-0.13, 0.16)     | 0.09 (-0.06, 0.24)  | 0.00 (-0.16, 0.16)  |
|        | Grass            | SES                 | 0                          | -0.17 (-0.31, -0.02) * | -0.15 (-0.29, 0.00) | -0.08 (-0.23, 0.06) |
|        |                  | SES+NO <sub>2</sub> | 0                          | -0.16 (-0.32, 0.00)    | -0.14 (-0.31, 0.04) | -0.07 (-0.28, 0.14) |
|        | Total Vegetation | SES                 | 0                          | -0.05 (-0.20, 0.09)    | -0.06 (-0.21, 0.09) | -0.04 (-0.19, 0.11) |
|        |                  | SES+NO <sub>2</sub> | 0                          | -0.03 (-0.19, 0.12)    | -0.02 (-0.19, 0.15) | 0.02 (-0.16, 0.21)  |

All models additionally controlled for season, sampling frame, neighborhood tenure, age, sex, race/ethnicity, individual SES (two-level categorical variable for education, and a six-level categorical variable for income), and area-level SES (% of census tract unemployed and % of census tract living below twice the FPL). \*  $p < 0.05$ .

**Table S4.** RRs and 95% CIs for the association between % trees, grass, and total vegetation as a continuous measure by buffer size with self-reported “very good” or “excellent” health compared to “good”, “fair”, or “poor” self-reported health.

| Buffer | Exposure         | Covariates            | RR (95% CI)            |
|--------|------------------|-----------------------|------------------------|
| 1000 m | Trees            | SES                   | 1.004 (0.997, 1.011)   |
|        |                  | SES + NO <sub>2</sub> | 1.010 (1.001, 1.018) * |
|        | Grass            | SES                   | 1.001 (0.992, 1.009)   |
|        |                  | SES + NO <sub>2</sub> | 1.012 (1.001, 1.024) * |
|        | Total Vegetation | SES                   | 1.002 (0.997, 1.006)   |
|        |                  | SES + NO <sub>2</sub> | 1.009 (1.003, 1.016) * |
| 300 m  | Trees            | SES                   | 0.998 (0.991, 1.005)   |
|        |                  | SES + NO <sub>2</sub> | 1.002 (0.994, 1.010)   |
|        | Grass            | SES                   | 0.997 (0.989, 1.005)   |
|        |                  | SES + NO <sub>2</sub> | 1.003 (0.993, 1.014)   |
|        | Total Vegetation | SES                   | 0.998 (0.994, 1.003)   |
|        |                  | SES + NO <sub>2</sub> | 1.002 (0.996, 1.008)   |

All models additionally controlled for season, sampling frame, neighborhood tenure, age, sex, race/ethnicity, individual SES (two-level categorical variable for education, and a six-level categorical variable for income), and area-level SES (% of census tract unemployed and % of census tract living below twice the FPL). \*  $p < 0.05$ .

**Table S5.** RRs of self-reported “very good” or “excellent” health of increasing quartiles of percent trees, grass, or vegetation within various radii of the reported nearest cross-street.

| Exposure         | Buffer Size | First Quartile (Reference) | Second Quartile     | Third Quartile      | Fourth Quartile     |
|------------------|-------------|----------------------------|---------------------|---------------------|---------------------|
| Trees            | 100 m       | 1                          | 1.06 (0.90, 1.24)   | 0.95 (0.81, 1.11)   | 0.95 (0.81, 1.12)   |
|                  | 300 m       | 1                          | 0.96 (0.81, 1.14)   | 1.05 (0.91, 1.22)   | 0.98 (0.83, 1.15)   |
|                  | 500 m       | 1                          | 1.06 (0.90, 1.25)   | 1.07 (0.91, 1.26)   | 1.06 (0.90, 1.25)   |
|                  | 1000 m      | 1                          | 1.19 (1.01, 1.40) * | 1.09 (0.93, 1.29)   | 1.23 (1.05, 1.43) * |
|                  | 2000 m      | 1                          | 1.01 (0.85, 1.20)   | 1.08 (0.92, 1.26)   | 1.15 (0.99, 1.34)   |
| Grass            | 100 m       | 1                          | 0.89 (0.76, 1.03)   | 0.81 (0.69, 0.95) * | 0.91 (0.78, 1.06)   |
|                  | 300 m       | 1                          | 0.81 (0.69, 0.95) * | 0.81 (0.69, 0.94) * | 0.90 (0.78, 1.05)   |
|                  | 500 m       | 1                          | 0.84 (0.71, 0.99) * | 0.90 (0.77, 1.06)   | 0.96 (0.83, 1.11)   |
|                  | 1000 m      | 1                          | 0.98 (0.83, 1.16)   | 1.04 (0.89, 1.22)   | 1.00 (0.86, 1.17)   |
|                  | 2000 m      | 1                          | 1.04 (0.88, 1.22)   | 1.03 (0.87, 1.21)   | 1.00 (0.85, 1.17)   |
| Total Vegetation | 100 m       | 1                          | 0.82 (0.70, 0.96)   | 0.86 (0.73, 1.00)   | 0.90 (0.77, 1.04)   |
|                  | 300 m       | 1                          | 0.86 (0.73, 1.02)   | 0.92 (0.79, 1.07)   | 0.91 (0.77, 1.06)   |
|                  | 500 m       | 1                          | 1.01 (0.86, 1.20)   | 0.98 (0.84, 1.16)   | 1.04 (0.89, 1.22)   |
|                  | 1000 m      | 1                          | 0.99 (0.83, 1.17)   | 1.10 (0.95, 1.29)   | 1.11 (0.96, 1.29)   |
|                  | 2000 m      | 1                          | 1.09 (0.93, 1.28)   | 1.09 (0.93, 1.29)   | 1.18 (1.01, 1.38) * |

All models additionally controlled for season, sampling frame, neighborhood tenure, age, sex, race/ethnicity, individual SES (two-level categorical variable for education, and a six-level categorical variable for income), and area-level SES (% of census tract unemployed and % of census tract living below twice the FPL). \*  $p < 0.05$ .

**Table S6.** RRs of self-reported “very good” or “excellent” health of increasing quartiles of percent trees, grass, or vegetation within various radii of the reported nearest cross-street also adjusted for NO<sub>2</sub> at either the 300 m or 1000 m buffer size, whichever is closer in size to the radial buffer for vegetation.

| Exposure         | Buffer Size | First Quartile (Reference) | Second Quartile     | Third Quartile      | Fourth Quartile     |
|------------------|-------------|----------------------------|---------------------|---------------------|---------------------|
| Trees            | 100 m       | 1                          | 1.07 (0.91, 1.25)   | 0.97 (0.83, 1.14)   | 1.00 (0.84, 1.19)   |
|                  | 300 m       | 1                          | 0.98 (0.83, 1.17)   | 1.10 (0.94, 1.29)   | 1.06 (0.89, 1.26)   |
|                  | 500 m       | 1                          | 1.09 (0.93, 1.28)   | 1.12 (0.95, 1.32)   | 1.15 (0.97, 1.37)   |
|                  | 1000 m      | 1                          | 1.23 (1.04, 1.44) * | 1.15 (0.97, 1.37)   | 1.36 (1.14, 1.61) * |
|                  | 2000 m      | 1                          | 1.03 (0.87, 1.23)   | 1.12 (0.96, 1.31)   | 1.27 (1.08, 1.50) * |
| Grass            | 100 m       | 1                          | 0.91 (0.77, 1.08)   | 0.85 (0.71, 1.02)   | 0.97 (0.79, 1.19)   |
|                  | 300 m       | 1                          | 0.84 (0.70, 1.00)   | 0.85 (0.70, 1.03)   | 0.97 (0.79, 1.19)   |
|                  | 500 m       | 1                          | 0.90 (0.75, 1.08)   | 1.01 (0.83, 1.22)   | 1.11 (0.90, 1.37)   |
|                  | 1000 m      | 1                          | 1.07 (0.90, 1.28)   | 1.21 (0.99, 1.48)   | 1.24 (0.99, 1.55)   |
|                  | 2000 m      | 1                          | 1.12 (0.94, 1.34)   | 1.16 (0.95, 1.41)   | 1.19 (0.95, 1.48)   |
| Total Vegetation | 100 m       | 1                          | 0.83 (0.71, 0.98)   | 0.90 (0.76, 1.07)   | 0.97 (0.81, 1.16)   |
|                  | 300 m       | 1                          | 0.89 (0.75, 1.06)   | 0.98 (0.82, 1.17)   | 1.01 (0.82, 1.24)   |
|                  | 500 m       | 1                          | 1.08 (0.91, 1.29)   | 1.10 (0.91, 1.32)   | 1.24 (1.01, 1.53) * |
|                  | 1000 m      | 1                          | 1.08 (0.90, 1.30)   | 1.26 (1.05, 1.50) * | 1.40 (1.14, 1.72) * |
|                  | 2000 m      | 1                          | 1.16 (0.98, 1.38)   | 1.22 (1.02, 1.46) * | 1.46 (1.19, 1.79) * |

All models additionally controlled for season, sampling frame, neighborhood tenure, age, sex, race/ethnicity, individual SES (two-level categorical variable for education, and a six-level categorical variable for income), and area-level SES (% of census tract unemployed and % of census tract living below twice the FPL). \*  $p < 0.05$ .

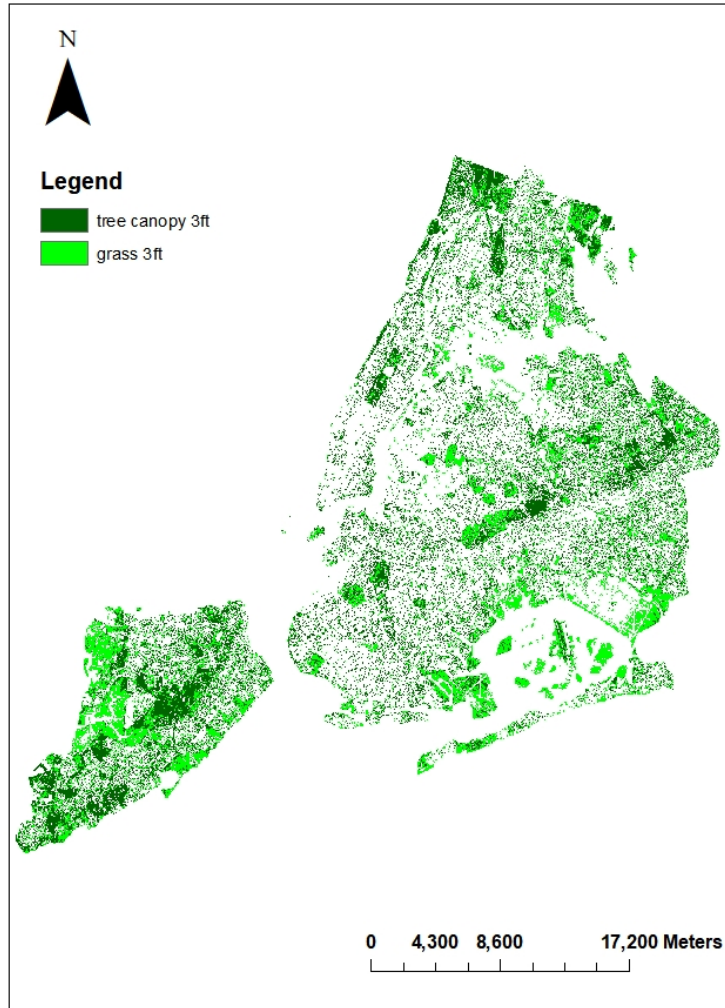

**Figure S1.** Map of tree and grass coverage at 3-ft resolution for all of NYC. NYC = New York City.



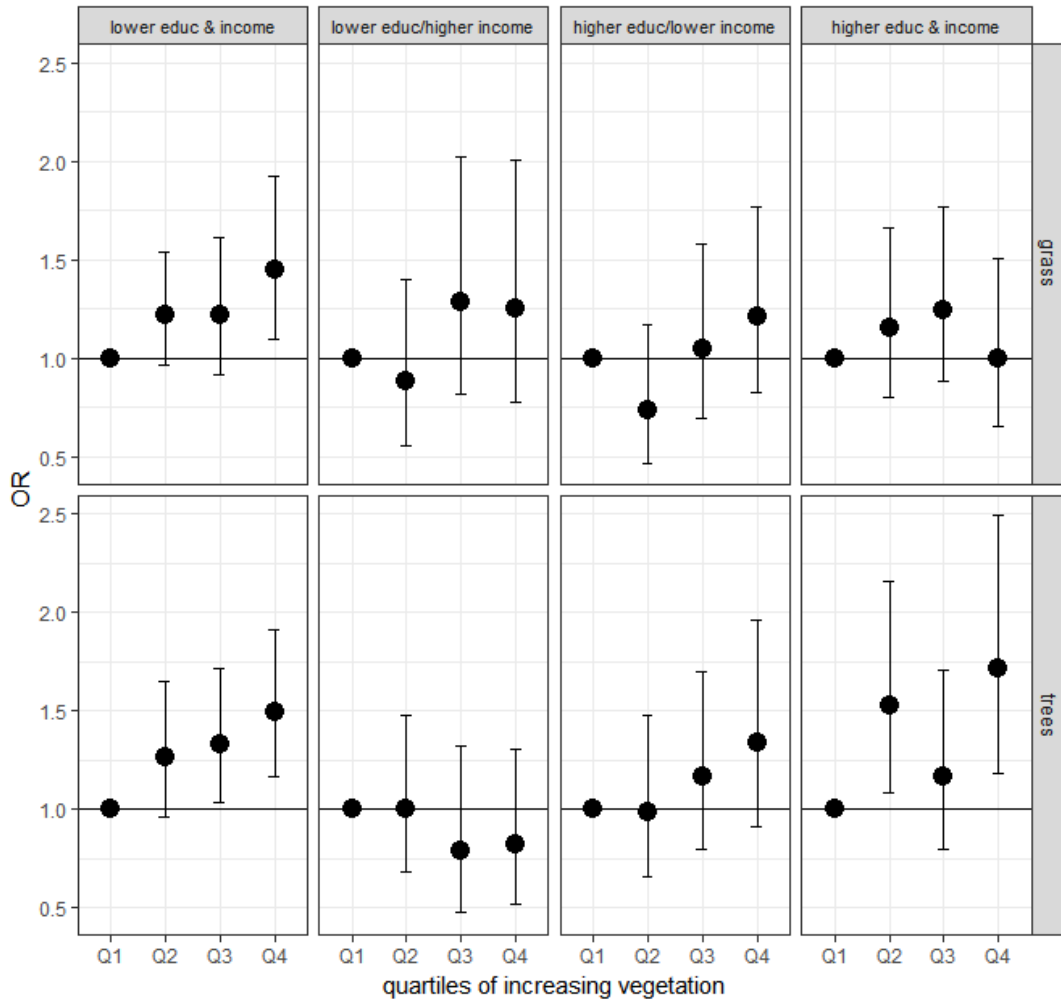

**Figure S2.** RRs for self-reported “very good” or “excellent” health by quartiles of % grass or % trees at 1000 m buffer by categorical SES levels additionally adjusted for individual-level and area-level SES and NO<sub>2</sub>.
